# Supplementary material
Source: publisher site journal article supplement (https://www.dovepress.com/article/113113)
Supplement: Supplementary file 1 [file get_supplementary_file.php]

## Supplementary material

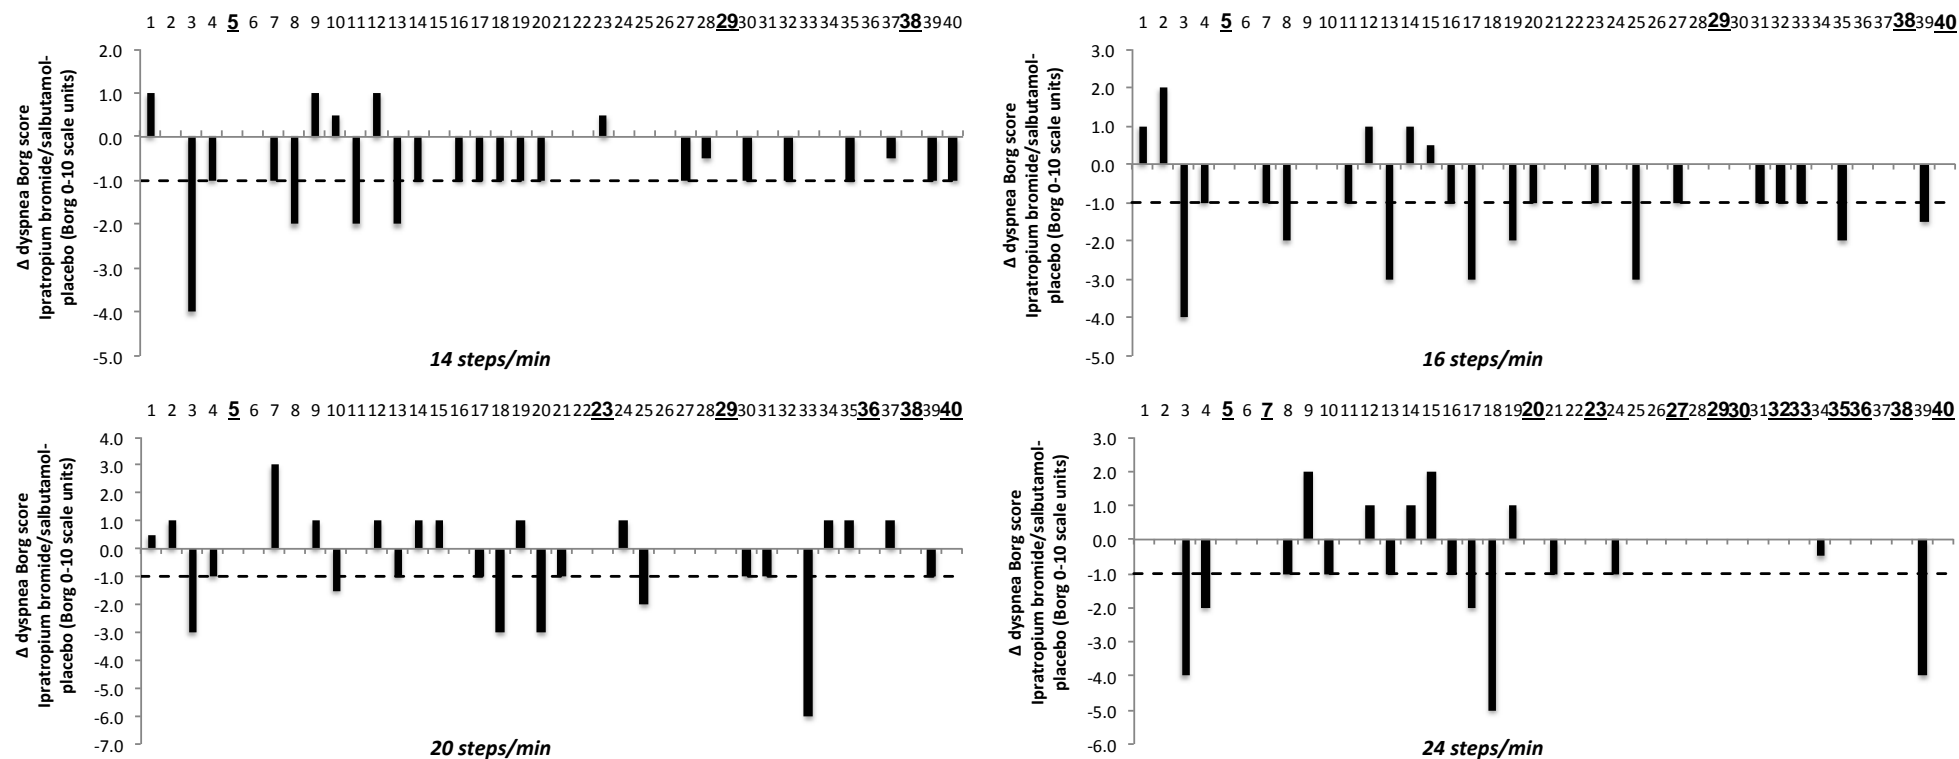

**Figure S1** Between-treatment individual dyspnea changes for all stepping rates, calculated from the following equation: dyspnea Borg score under bronchodilation - dyspnea Borg score under placebo condition. Borg scores were obtained at the third minute of each 3-min MST performed under both conditions by each individual patient. The absence of data represents either: i) no change in Borg dyspnea scores with bronchodilation compared to placebo or ii) non-completion of one of both of the 3-min constant rate step tests, the bold and underlined numbers, indicating the non-completers.

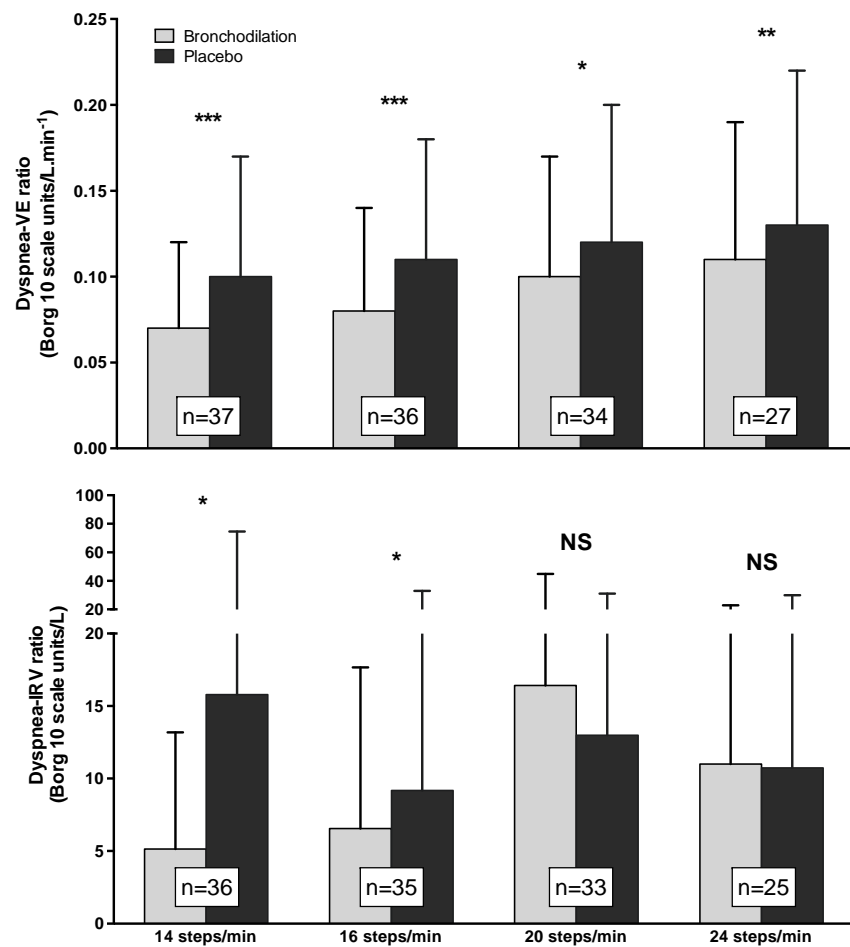

**Figure S2** Dyspnea – Ventilation and Dyspnea – IRV ratios during the 3-MST under both conditions (bronchodilation and placebo). The number of patients having completed both treatment conditions at a given stepping is indicated in white boxes. The bottom panel only includes patients in whom inspiratory capacity maneuvers were technically acceptable. \* $P < 0.05$ , \*\*  $P < 0.01$ , \*\*\*  $P < 0.001$ : significant difference between bronchodilation and placebo conditions.
